# Supplementary material for: How midwives implemented teleconsultations during the COVID-19 health crisis: a mixed-methods study
Source: HighWire-hosted journal article supplement (doi:10.1136/bmjopen-2021-057292), 2022-04-01
Supplement: bmjopen-2021-057292supp001_data_supplement.pdf [file bmjopen-2021-057292supp001_data_supplement.pdf]

**Appendix 1: Questionnaire**

*O corresponded to unique choice question*

*corresponded to multiple-choice question*

**Part 1: individual characteristics and practice setting**

1. How old are you?

2. Specify the length (number of years) of your professional experience

3. Are you:

A man

A woman

4. What is your family situation?

Single or divorced or widowed

Living with a partner or married

5. What is your primary mode of practice?

Solo

With other midwives

In a group of  $\geq 2$  types of medical professionals

6. What is your administrative/geographical district of practice?

**Part 2: Teleconsultations**

1. Do you offer your patients teleconsultations?

Yes

No

2. If not (1), why not?

- For technical reasons
- Because I am not convinced that this is a useful or appropriate mode of practice
- Because my patients are not in favour of it
- Other reasons

If Yes (1) :

3. For which types of consultation/activity do you offer teleconsultations?

- Early prenatal interview
- Individual childbirth preparation
- Collective childbirth preparation
- 4th and 7th month pregnancy consultation
- Postnatal follow-up (mother and child)
- Postnatal visit
- Contraception prescription
- Preventive gynaecology consultation
- Alternative medicine(s) (osteopathy, acupuncture, hypnosis, yoga ...)
- Support of women with psychological fragility
- Other(s)

4. What tool do you use for teleconsultations?

- Telephone
- Videoconference with specific secure professional tool (ex: Doctolib, Prédix, Covaliaweb or Mondocteur.fr)
- Videoconference without a specific professional tool (ex: Whatsapp, Facetime, Zoom or Skype)

5. What proportion of your activity is represented by teleconsultations currently?

- < 25%
- Around 50%
- > 75%

100%

6. Was teleconsultation easy to set up?

Yes

No

7. Are you satisfied with this new mode of practice?

Yes

No

8. The implementation of teleconsultations was done

On my initiative

At the request of patient

For all patients

For women who tested positive for Covid 19

For symptomatic women

9. What was your motivation(s) for implementing teleconsultations?

To provide continuity of care to my patients

To maintain contact with my most vulnerable or fragile patients

To maintain a salary and pay my expenses

To avoid becoming infected

To prevent my patients' infection

To follow practice guidelines during the pandemic

Other reasons

10. Do you plan to continue teleconsultations after the crisis and integrate this new type of visit into your practice if possible?

Yes

No
